# Supplementary material for: Analysis of Proteins and Peptides of Highly Purified CD9+ and CD63+ Horse Milk Exosomes Isolated by Affinity Chromatography
Source: MDPI journal article supplement (doi:10.3390/ijms232416106), 2022-12-17
Supplement: s1 [file s1]

**Table S1.** MALDI-TOF-MS/MS analysis of p1 horse milk exosome fraction after gel-filtration on Ultrogel A4.

| Identified protein     | Peptides identified <sup>1</sup>                      |
|------------------------|-------------------------------------------------------|
| CD9 tetraspanin        | DVLSSFTTKPCPEAIK<br>DIQEFYK                           |
| CD63 tetraspanin       | DNHTALILDR<br>GQVPDSCCVNVTQGCGTK                      |
| CD81 tetraspanin       | QFYDQALQQAVVDDDDANNAK<br>INLCPSGSSVLTNLFK<br>IDELFSGK |
| Lactadherin            | TWGLNAFSWYPFYAR<br>VNMFDVPLEVQYVR                     |
| beta-Actin             | SYELPDGQVITIGNER<br>GYSFTTTAER                        |
| Butyrophilin           | DQLSPAVLVYQNGQER<br>GSVALLIQHVR                       |
| Lactoferrin            | NLLFNDNTECLAELQGK<br>SDADLTWNSLSGK<br>YELLCPDNTR      |
| Xanthine dehydrogenase | ITYEDLPAIITIEDAIK<br>DPPANVQLFQEVPK<br>IPAFGSIPIEFR   |

<sup>1</sup> For the identification of proteins and their molecular masses, the 2016 SwissProt program was used.
